# Supplementary material
Source: PubMed Central journal article supplement (PMC7165453)
Supplement: pnas.1920875117.sapp.pdf [file pnas.1920875117.sapp.pdf]

## Supporting information for

Bioluminescent backlighting illuminates the complex visual signals of a social squid in the deep sea

Benjamin P. Burford<sup>1,2\*</sup> & Bruce H. Robison<sup>2</sup>

<sup>1</sup> Hopkins Marine Station, Stanford University, Pacific Grove, CA, 93950

<sup>2</sup> Monterey Bay Aquarium Research Institute, Moss Landing, CA, 95039

\*Corresponding author: Benjamin P. Burford

Email: [bburford@stanford.edu](mailto:bburford@stanford.edu)

## This PDF file includes:

- SI Methods
- Figures S1 to S3
- Tables S1 to S3
- Legend for Movie S1
- Legend for Dataset S1
- SI References

## Other supplementary materials for this manuscript include the following:

- Movie S1
- Dataset S1

## **SI Methods**

To visualize the phylogenetic context of the proposed mechanism by which pigmentation patterns can function as visual signals in darkness, we mapped relevant ecological, morphological, and behavioral information to a published genus-level phylogeny of the Decabrachia (squids and cuttlefish) (1) (Figure S3). Reference (1) conducted phylogenetic inference using a partitioned maximum likelihood analysis of publicly available mitochondrial and nuclear marker sequences with 1000 bootstrap replicates under the GTR model of evolution with Gamma distribution (*Vampyroteuthis* as the outgroup). This phylogeny includes the largest taxonomic coverage and collection of marker sequences to date, is generally congruent with previous work (2-5), and supports major clades including the Ommastrephinae. Lower typical daytime depth distributions of genera included in the phylogeny were determined from published depth ranges (6, 7), of all species within each genus (if known), and categorized by the predominant mode within a genus: mesopelagic (200-1000 m) and deeper, or epipelagic (0-200). If species were evenly split between these categories, then the genus was assigned to the mesopelagic and epipelagic category. Possession of numerous, small subcutaneous photophores within each genus was determined from published morphological information (6, 7), and we compiled the relevant literature to ascertain the chromatic component repertoires (8-25). The number of chromatic components displayed by a genus was categorized as many ( $>10$ ) or few ( $\leq 10$ ) based on the average component repertoire of all species studied within a genus.

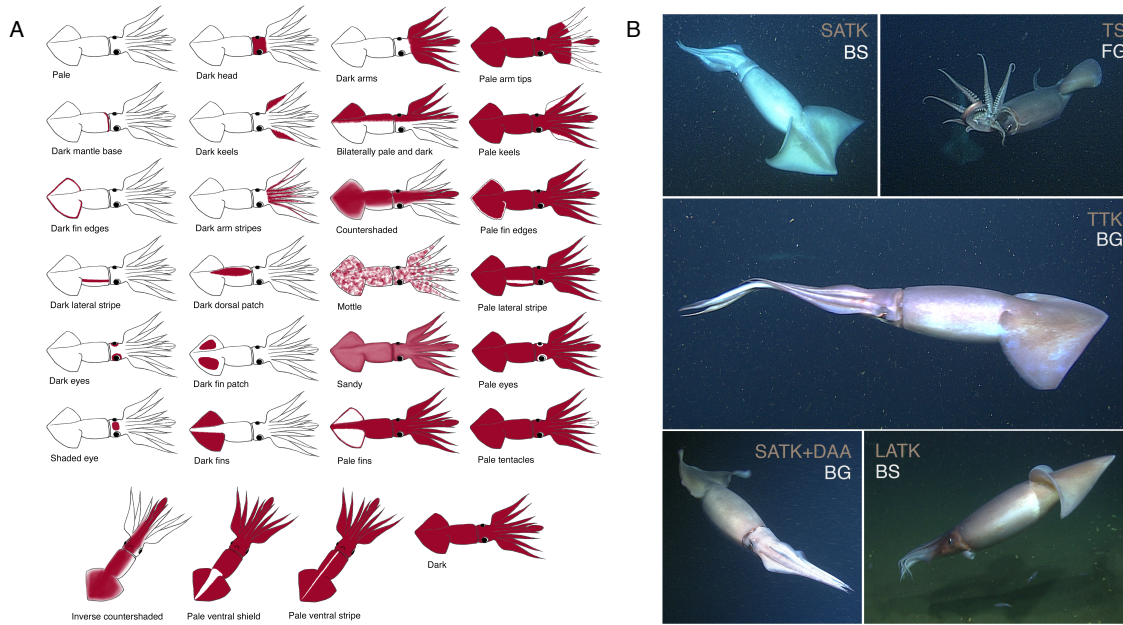

**Figure S1.**

A) Illustrations of the 28 chromatic components performed by *Dosidicus gigas* (related to Figure 1-3). *Inverse countershaded*, *pale ventral shield*, and *pale ventral stripe* (bottom row) are drawn on squid with their ventral surface facing up. B) Examples of various postural and locomotor components analyzed in this study (related to Figure 2-3). See (Table 1) for component abbreviations.

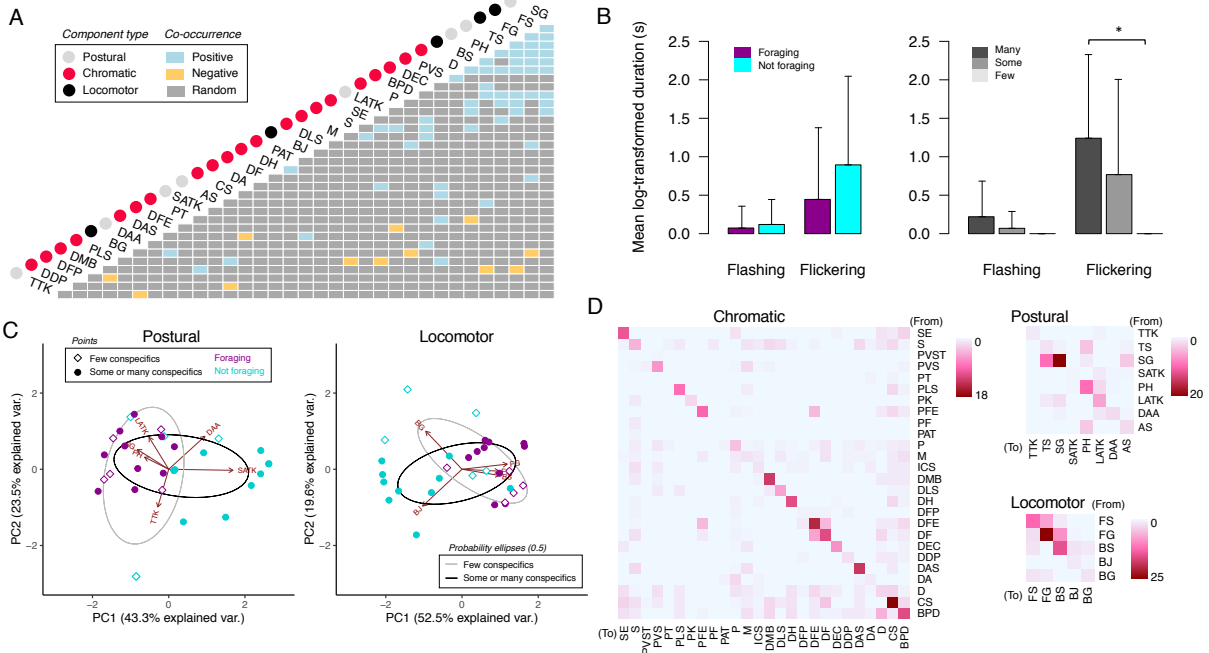

**Figure S2.**

A) Positive, negative, and random component associations of *D. gigas* (n=30) determined by a probabilistic co-occurrence model (related to Figure 1-2). Component abbreviations indicate the columns and rows representing their pairwise relationships with other components. Point color indicates component type, and box color represents co-occurrence category. B) Comparison of the average log-transformed duration of variable chromatic components (*flashing* and *flickering*) between foraging status and conspecific abundance categories in *D. gigas* (n=30 each). Bars represent standard deviation of the mean. \*Significant difference between means (ANOVA, Tukey HSD) (see Table S2). In this study, foraging and not foraging distinguish whether or not a squid attempted to capture prey. C) Principal component analyses and vectors of postural and locomotor components with 50% probability ellipses encircling conspecific abundance clusters (related to Figure 2). In both, each *D. gigas* (n=30) is represented by a single point colored by foraging status and shaped by conspecific abundance category. Red arrows and abbreviations represent the vectors, or relative contribution of different components to the behavioral trends among squid. D) Adjacency network heatmaps of chromatic, postural, and locomotor components displayed by foraging *D. gigas* (n=15) (related to Figure 2). Color denotes the number of occurrences that squid transitioned from components on the vertical axes to components on the horizontal axes, with prolonged single-component display included. See (Table 1) for component abbreviations.

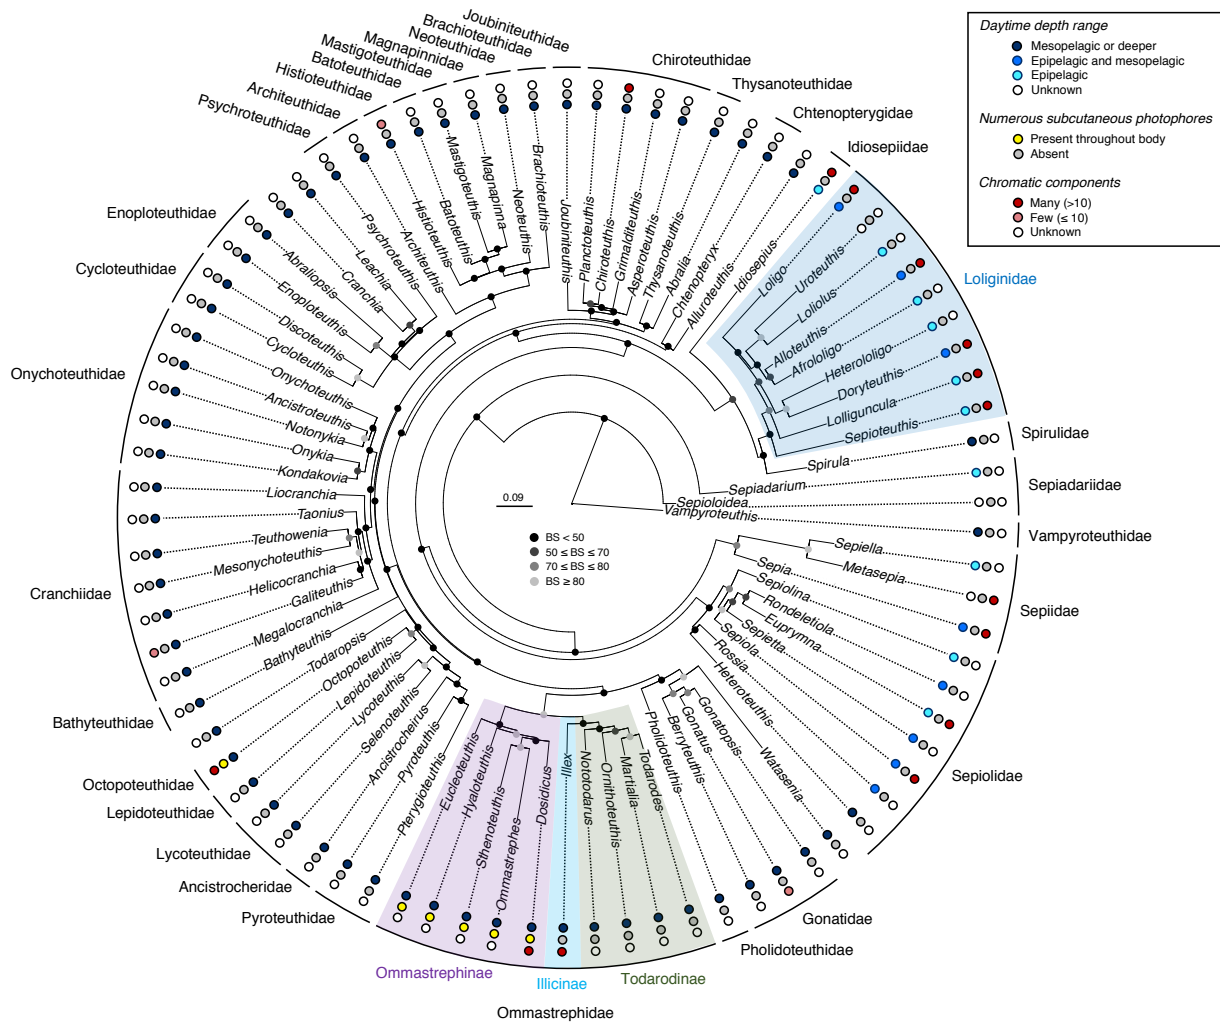

**Figure S3.**

Phylogenetic context of the proposed mechanism by which pigmentation patterns can function as visual signals under low-light conditions (related to Figure 3). Genus-level phylogeny of the Decabrachia (squids and cuttlefish) from reference (1) overlaid with relevant ecological, morphological, and behavioral information. Bootstrap support for each clade is color-coded with points, and four clades are shaded: subfamily Ommastrephinae (purple), Illicinae (light blue), and Todarodinae (green), and family Loliginidae (blue). Note that all genera in the Ommastrephinae have deep daytime depths and numerous subcutaneous photophores.

| Component                  |                                                                                                                           | Description | Eigenvectors             |                          |
|----------------------------|---------------------------------------------------------------------------------------------------------------------------|-------------|--------------------------|--------------------------|
| <i>Postural</i>            |                                                                                                                           |             | <i>PC1 (43.3%, 1.95)</i> | <i>PC2 (23.5%, 1.06)</i> |
| Dorsal arm arch            | Slightraising of first arm pair while all arms together and pointed ("Dorsal arm lift," †)                                |             | 0.42                     | -0.52                    |
| Loose arm tips, keeled     | Arms bundled posteriorly and loose anteriorly, third arm aboral extensions (keels) laterally spread (‡)                   |             | -0.23                    | -0.5                     |
| Prey handling              | One or more arms inwardly curled while manipulating prey toward beak (‡)                                                  |             | -0.28                    | -0.19                    |
| Stiff arm tips, keeled     | Arms tightly bundled, third arm keels laterally spread (‡)                                                                |             | 0.74                     | 0.02                     |
| Arm strike                 | All arms splayed and suckers extended laterally while attempting to grasp prey ("Strike, arms only," ‡)                   |             | *                        | *                        |
| Strike glide               | Stiff arm tips, fins dorsally curled ("Fin curl," †; ‡)                                                                   |             | -0.36                    | -0.31                    |
| Tentacle strike            | Arm pairs I, II, and IV splayed; pair III guides extended tentacles toward prey during capture attempt (‡)                |             | *                        | *                        |
| Trailing tentacles, keeled | Arms bundled and slightly loose anteriorly, third arm keels laterally spread, tentacles held extended beyond arm tips (‡) |             | -0.13                    | 0.59                     |
| <i>Chromatic</i>           |                                                                                                                           |             | <i>PC1 (18.3%, 2.95)</i> | <i>PC2 (12.4%, 2)</i>    |
| Bilaterally pale and dark  | Body half pale and half dark, laterally divided (‡)                                                                       |             | 0.12                     | -0.12                    |
| Countershaded              | Body darkest on dorsal surface, shading fades dorsoventrally to pale on ventral surface (‡)                               |             | -0.42                    | -0.08                    |
| Dark                       | Entire body surface darkened, opposite of "Pale" ("All dark," †; ‡)                                                       |             | 0.16                     | -0.17                    |
| Dark arm stripes           | Aboral arm surfaces dark, rest of arms pale (adapted from ‡)                                                              |             | -0.27                    | -0.14                    |
| Dark arms                  | Arms all dark (adapted from ‡)                                                                                            |             | 0.02                     | 0.08                     |
| Dark dorsal patch          | Dark oviform patch on dorsal mantle surface (e)                                                                           |             | 0.08                     | 0                        |
| Dark eye circle            | Dark rings encompassing eyes (e)                                                                                          |             | 0.15                     | -0.04                    |
| Dark fin edges             | Dark outer fin margins terminating at posterior mantle (adapted from ‡ and "Fin stripe," †)                               |             | -0.19                    | -0.26                    |
| Dark fin patch             | Darkened patch on dorsal fin surface (e)                                                                                  |             | **                       | **                       |
| Dark fins                  | Darkened fin dorsal surface (†)                                                                                           |             | 0.02                     | -0.34                    |
| Dark head                  | Head all dark (adapted from ‡)                                                                                            |             | -0.07                    | -0.06                    |
| Dark keels                 | Darkened dorsal surface of third arm keels (†)                                                                            |             | -0.04                    | -0.09                    |
| Dark lateral stripes       | Dark horizontal stripe running anteroposteriorly along mantle midline (e)                                                 |             | -0.04                    | -0.08                    |
| Dark mantle base           | Dark border of anterior mantle edge (e)                                                                                   |             | -0.42                    | 0.24                     |
| Inverse countershaded      | Body darkest on ventral surface, shading fades to pale on dorsal surface (‡)                                              |             | 0.07                     | 0.06                     |
| Mottle                     | Irregular, dynamic dark patches covering entire body surface (‡)                                                          |             | 0.15                     | -0.09                    |
| Pale                       | No chromatophores expanded along entire body surface ("Clear," †; ‡)                                                      |             | 0.23                     | -0.01                    |
| Pale arm tips              | Arm tips without pigmentation (adapted from ‡)                                                                            |             | -0.05                    | -0.01                    |
| Pale eyes                  | Pale rings encompassing eyes (e)                                                                                          |             | 0.02                     | 0.08                     |
| Pale fin edges             | Pale outer fin margins terminating at posterior mantle (e)                                                                |             | -0.08                    | 0.46                     |
| Pale fins                  | Fins without pigment (adapted from ‡)                                                                                     |             | -0.06                    | 0.1                      |
| Pale keels                 | Pale dorsal surface of third arm keels (e)                                                                                |             | -0.06                    | 0.22                     |
| Pale lateral stripes       | Pale horizontal stripe running anteroposteriorly along mantle midline (‡)                                                 |             | -0.36                    | -0.15                    |
| Pale tentacles             | Tentacles without pigment (e)                                                                                             |             | -0.24                    | -0.2                     |
| Pale ventral shield        | Pale, iridescent ventral posterior mantle (adapted from ‡)                                                                |             | -0.2                     | -0.3                     |
| Pale ventral stripe        | Pale stripe running anteroposteriorly along ventral mantle surface (adapted from ‡)                                       |             | 0.08                     | 0.05                     |
| Sandy                      | Entire body uniform grainy coloration of mixed pale and dark (‡)                                                          |             | 0.15                     | 0.28                     |
| Shaded eye                 | Dark band between eyes (†)                                                                                                |             | 0.33                     | -0.38                    |
| <i>Locomotor</i>           |                                                                                                                           |             | <i>PC1 (52.5%, 1.63)</i> | <i>PC2 (19.6%, 0.61)</i> |
| Back glide                 | Slow tail-first locomotion from siphon jet pulses with fins extended laterally (‡)                                        |             | -0.41                    | 0.71                     |
| Back jet                   | Fast tail-first locomotion from siphon jetting with fins wrapped around mantle (‡)                                        |             | -0.45                    | -0.69                    |
| Back swim                  | Tail-first locomotion from fin-flapping, sometimes with jetting (‡)                                                       |             | 0.43                     | -0.12                    |
| Forward glide              | Slow arms-first locomotion from siphon jet pulses with fins extended laterally (‡)                                        |             | 0.52                     | 0.1                      |
| Forward swim               | Arms-first locomotion from fin-flapping, sometimes with jetting (‡)                                                       |             | 0.42                     | -0.04                    |

† Bell (2011); ‡ Trueblood et al. (2015); e present study; \* used to define foraging squid and thus excluded from analysis; \*\* performed by fewer than 4 squid and thus excluded from analysis

**Table S1.**

Behavioral components recorded and analyzed in *Dosidicus gigas* (n=30), with descriptions and summary statistics from principal component analyses (PCAs) (related to Figure 1, Figure 2, Figure S1, and Figure S2). Eigenvalues and variance terms of principal component one (PC1) and two (PC2) are included in parentheses in the component type headings. Postural, chromatic, and locomotor components are defined with the reference(s) for the original description indicated in the bottom row. Eigenvector scores from PCAs are listed for each component.

|                       |            | ANOVA results         |    |       |         |              | Tukey HSD results     |            |              |              |                  |
|-----------------------|------------|-----------------------|----|-------|---------|--------------|-----------------------|------------|--------------|--------------|------------------|
| Ecological category   | Behavior   | Level                 | DF | MS    | F-value | p-value      | Comparison            | Difference | Lower 95% CI | Upper 95% CI | adjusted p-value |
| foraging status       | flashing   | foraging status       | 1  | 0.016 | 0.17    | 0.68         | not foraging-foraging | 0.046      | -0.18        | 0.27         | 0.68             |
|                       |            | residuals             | 28 | 0.093 |         |              |                       |            |              |              |                  |
|                       | flickering | foraging status       | 1  | 1.51  | 1.38    | 0.25         | not foraging-foraging | 0.445      | -0.33        | 1.23         | 0.25             |
|                       |            | residuals             | 28 | 1.01  |         |              |                       |            |              |              |                  |
| conspicific abundance | flashing   | conspicific abundance | 2  | 0.13  | 1.44    | 0.25         | few-many              | -0.22      | -0.55        | 0.11         | 0.24             |
|                       |            | residuals             | 27 | 0.088 |         |              | some-many             | -0.15      | -0.48        | 0.18         | 0.5              |
|                       |            |                       |    |       |         |              | some-few              | 0.069      | -0.26        | 0.4          | 0.86             |
|                       | flickering | conspicific abundance | 2  | 3.92  | 4.33    | <b>0.023</b> | few-many              | -1.24      | -2.3         | -0.19        | <b>0.019</b>     |
|                       |            | residuals             | 27 | 0.91  |         |              | some-many             | -0.47      | -1.53        | 0.58         | 0.51             |
|                       |            |                       |    |       |         |              | some-few              | 0.77       | -0.29        | 1.82         | 0.19             |

**Table S2.**

ANOVA and Tukey HSD results from a comparison of variable chromatic behavior (*flashing* and *flickering*) duration between factors within ecological categories in *Dosidicus gigas* (see Figure S2B). Significant factors affecting duration, or significant differences between means within a comparison, are shaded in bold (n=30).

| Photophore type | Division          | Region            | Average ( $\pm 1SD$ ) photophores cm <sup>-1</sup> | DF | t-value | p-value |
|-----------------|-------------------|-------------------|----------------------------------------------------|----|---------|---------|
| small           | <i>whole body</i> | <i>whole body</i> | 4.17 ( $\pm 0.81$ )                                |    |         |         |
|                 | fins              | centers           | 3.75 ( $\pm 2.1$ )                                 | 39 | -0.12   | 0.91    |
|                 | fins              | fin edges         | 9.78 ( $\pm 4.2$ )                                 | 39 | 1.59    | 0.12    |
|                 | mantle            | base              | 0                                                  | 39 | -1.18   | 0.24    |
|                 | mantle            | dorsal            | 2.26 ( $\pm 0.51$ )                                | 39 | -0.54   | 0.59    |
|                 | mantle            | lateral stripes   | 5.07 ( $\pm 2.1$ )                                 | 39 | 0.25    | 0.8     |
|                 | mantle            | ventral           | 0                                                  | 39 | -1.18   | 0.24    |
|                 | mantle            | ventral shield    | 0                                                  | 39 | -1.18   | 0.24    |
|                 | mantle            | ventral stripe    | 0                                                  | 39 | -1.18   | 0.24    |
|                 | arms and head     | arms              | 12.54 ( $\pm 4.36$ )                               | 39 | 2.37    | 0.022   |
|                 | arms and head     | dorsal head       | 35.11 ( $\pm 13.41$ )                              | 39 | 8.77    | <0.0001 |
|                 | arms and head     | keels             | 17.92 ( $\pm 10.17$ )                              | 39 | 3.9     | 0.0004  |
|                 | arms and head     | tentacles         | 9.58 ( $\pm 2.17$ )                                | 39 | 1.53    | 0.13    |
|                 | arms and head     | ventral head      | 13.11 ( $\pm 4.38$ )                               | 39 | 2.53    | 0.015   |
| large           | <i>whole body</i> | <i>whole body</i> | 1.44 ( $\pm 0.3$ )                                 |    |         |         |
|                 | fins              | centers           | 0                                                  | 39 | -2.4    | 0.021   |
|                 | fins              | fin edges         | 0                                                  | 39 | -2.4    | 0.021   |
|                 | mantle            | base              | 7.90 ( $\pm 1.31$ )                                | 39 | 10.76   | <0.0001 |
|                 | mantle            | dorsal            | 0                                                  | 39 | -2.4    | 0.021   |
|                 | mantle            | lateral stripes   | 0                                                  | 39 | -2.4    | 0.021   |
|                 | mantle            | ventral shield    | 3.05 ( $\pm 0.85$ )                                | 39 | 2.68    | 0.011   |
|                 | mantle            | ventral           | 3.24 ( $\pm 1.03$ )                                | 39 | 3       | 0.0047  |
|                 | mantle            | ventral stripe    | 4.45 ( $\pm 2.69$ )                                | 39 | 5.013   | <0.0001 |
|                 | arms and head     | arms              | 0                                                  | 39 | -2.4    | 0.021   |
|                 | arms and head     | dorsal head       | 0                                                  | 39 | -2.4    | 0.021   |
|                 | arms and head     | keels             | 0                                                  | 39 | -2.4    | 0.021   |
|                 | arms and head     | tentacles         | 0                                                  | 39 | -2.4    | 0.021   |
|                 | arms and head     | ventral head      | 0                                                  | 39 | -2.4    | 0.021   |

**Table S3.**

Regression statistics from linear mixed effects analyses relating the density of small or large photophores to different pigmentation changing regions of *Dosidicus gigas* (related to Figure 3). Each region was compared to the overall whole-body density of each photophore type (which is included in shaded grey boxes for reference). Thus there were two regressions comparing measurements of four squid at each body region. Regions highlighted in yellow indicate those where photophores were significantly more abundant per unit body area than the average whole body density (n=4).



**Movie S1 (separate file).**

A group of *Dosidicus gigas* changing pigmentation patterning while feeding on lanternfish (Myctophidae) at depth (related to Figure 1, 2). This footage was captured on December 1, 2009 by the Monterey Bay Aquarium Research Institute (MBARI) ROV *Ventana* at 480 m depth in Monterey Canyon, CA (36.70319, -122.04322). Footage © MBARI.

***Dataset S1 (separate file).***

The datasets generated and analyzed in this study.

## SI References

1. G. Sanchez *et al.*, Genus-level phylogeny of cephalopods using molecular markers: current status and problematic areas. *PeerJ*. **6**, e4331 (2018).
2. A. R. Lindgren, Molecular inference of phylogenetic relationships among Decapodiformes (Mollusca: Cephalopoda) with special focus on the squid order Oegopsida. *Mol. Phylogenetics Evol.* **56**, 77–90 (2010).
3. A. R. Lindgren, M. S. Pankey, F. G. Hochberg, T. H. Oakley, A multi-gene phylogeny of Cephalopoda supports convergent morphological evolution in association with multiple habitat shifts in the marine environment. *BMC Evol. Biol.* **12**, 129 (2012).
4. A. R. Tanner, *et al.* Molecular clocks indicate turnover and diversification of modern coleoid cephalopods during the Mesozoic Marine Revolution. *Proc. R. Soc. B.* **284**, 20162818 (2017).
5. J. E. Uribe, R. Zardoya, Revisiting the phylogeny of Cephalopoda using complete mitochondrial genomes. *J. Molluscan Stud.* **83**, 133–144 (2017).
6. P. Jereb, C. F. E. Roper, “Cephalopods of the World. an Annotated and Illustrated Catalogue of Cephalopod Species Known to Date. Volume 1. Chambered Nautiluses and Sepioids (Nautilidae, Sepiidae, Sepiadariidae, Idiosepiidae and Spirulidae). FAO Species Catalogue for Fishery Purposes.” (FAO, 2005), 262 pp.
7. P. Jereb, C. F. E. Roper, “Cephalopods of the World. An Annotated and Illustrated Catalogue of Species Known to Date. Volume 2. Myopsid and Oegopsid Squids. FAO Species Catalogue for Fishery Purposes.” (FAO, 2010), 605 pp.
8. S. L. Bush, B. H. Robison, R. L. Caldwell, Behaving in the dark: locomotor, chromatic, postural, and bioluminescent behaviors of the deep-sea squid *Octopoteuthis deletron* Young 1972. *Biol. Bull.* **216**, 7–22 (2009).
9. B. P. Burford, B. H. Robison, R. E. Sherlock, Behaviour and mimicry in the juvenile and subadult life stages of the mesopelagic squid *Chroteuthis calyx*. *J. Mar. Biol. Ass. U. K.* **95**, 1221–1235 (2015).
10. L. A. Trueblood, S. Zylinski, B. H. Robison, B. A. Seibel, An ethogram of the Humboldt squid *Dosidicus gigas* Orbnigny (1835) as observed from remotely operated vehicles. *Behaviour.* **152**, 1911–1932 (2015).
11. R. T. Hanlon, J. B. Messenger, “Cephalopod Behavior” (Cambridge University Press, 2018), 365 pp.
12. L. E. Bell, “Behavioral ecology of the Humboldt squid, *Dosidicus gigas*: insights from an animal-borne video and data logging system.” Undergraduate thesis, (Stanford University, 2011).
13. R. T. Hanlon, M. J. Smale, W. H. Sauer, An ethogram of body patterning behavior in the squid *Loligo vulgaris reynaudii* on spawning grounds in South Africa. *Biol. Bull.* **187**, 363–372 (1994).
14. T. M. Jantzen, J. N. Havenhand, Reproductive behavior in the squid *Sepioteuthis australis* from South Australia: interactions on the spawning grounds. *Biol. Bull.* **204**, 305–317 (2003).
15. M. Moynihan, Notes on the behavior of *Euprymna scolopes* (Cephalopoda: Sepiolidae). *Behaviour.* **85**, 25–41 (1983).
16. M. Moynihan, Notes on the behavior of *Idiosepius pygmaeus* (Cephalopoda; Idiosepiidae). *Behaviour.* **85**, 42–57 (1983).
17. M. R. Lipiński, Laboratory survival of *Alloteuthis subulata* (Cephalopoda: Loliginidae) from the Plymouth area. *J. Mar. Biol. Ass. U. K.* **65**, 845–855 (1985).
18. R. T. Hanlon, J. B. Messenger, Adaptive coloration in young cuttlefish (*Sepia officinalis* L.): the morphology and development of body patterns and their relation to behaviour. *Philos. Trans. R. Soc. Lond. B.* **320**, 437–487 (1988).
19. C. F. E. Roper, F. G. Hochberg, Behavior and systematics of cephalopods from Lizard Island, Australia, based on color and body patterns. *Malacologia.* **29**, 153–193 (1988).
20. E. Mauris, Colour patterns and body postures related to prey capture in *Sepiola affinis* (Mollusca: Cephalopoda). *Mar. Fresh. Behav. Physiol.* **14**, 189–200 (1989).
21. J. C. Hunt, “The behavioral ecology of midwater cephalopods from Monterey Bay: submersible and laboratory observations.” PhD thesis, (University of California Los Angeles, 1996).

22. J. C. Hunt, L. D. Zeidberg, W. M. Hamner, B. H. Robison, The behaviour of *Loligo opalescens* (Mollusca: Cephalopoda) as observed by a remotely operated vehicle (ROV). *J. Mar. Biol. Ass. U. K.* **80**, 873–883 (2000).
23. J. C. Hunt, B. A. Seibel, Life history of *Gonatus onyx* (Cephalopoda: Teuthoidea): ontogenetic changes in habitat, behavior and physiology. *Mar. Biol.* **136**, 543–552 (2000).
24. L. D. Zeidberg, Allometry measurements from in situ video recordings can determine the size and swimming speeds of juvenile and adult squid *Loligo opalescens* (Cephalopoda: Myopsida). *J. Exp. Biol.* **207**, 4195–4203 (2004).
25. J. Harrop, M. Vecchione, J. D. Felley, In situ observations on behaviour of the ommastrephid squid genus *Illex* (Cephalopoda: Ommastrephidae) in the northwestern Atlantic. *J. Nat. Hist.* **48**, 2501–2516 (2014).
